# Supplementary material for: The interaction of imperviousness and habitat heterogeneity drives bird richness patterns in south Asian cities
Source: Springer Nature journal article supplement (doi:10.1007/s11252-020-01037-8), 2020-07-18
Supplement: MOESM1 [file 18194562]

## ESM (Electronic Supplementary Materials): Figures

**Authors:** Marufa Sultana, Luca Corlatti, Ilse Storch

**Journal name:** Urban Ecosystem

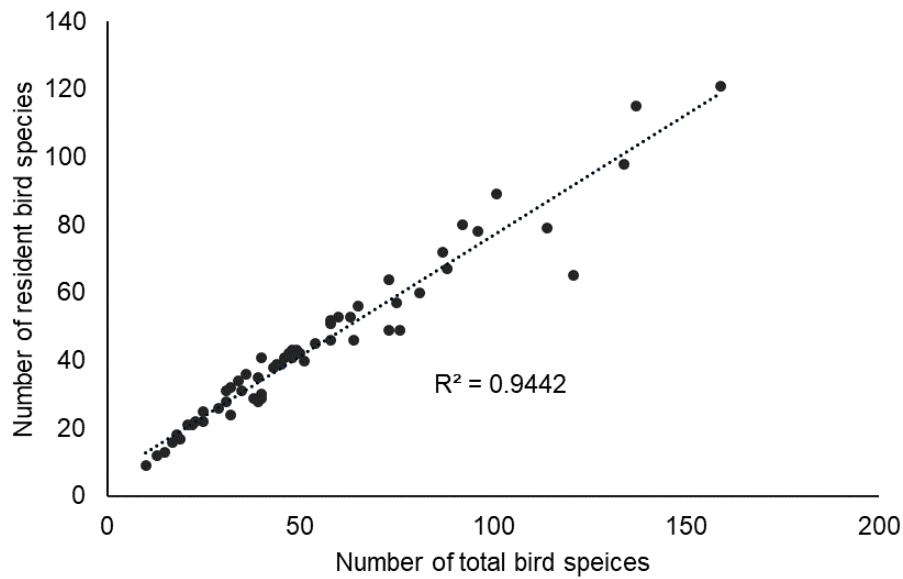

**ESM\_Fig\_1:** A correlation plot of the number of observed resident bird species in relation to the number of total bird species at the surveyed urban locations. The total bird species includes all observed species at the locations. In contrast, the resident bird species includes only the species which are site specific native and very likely to occur at the location throughout the year.

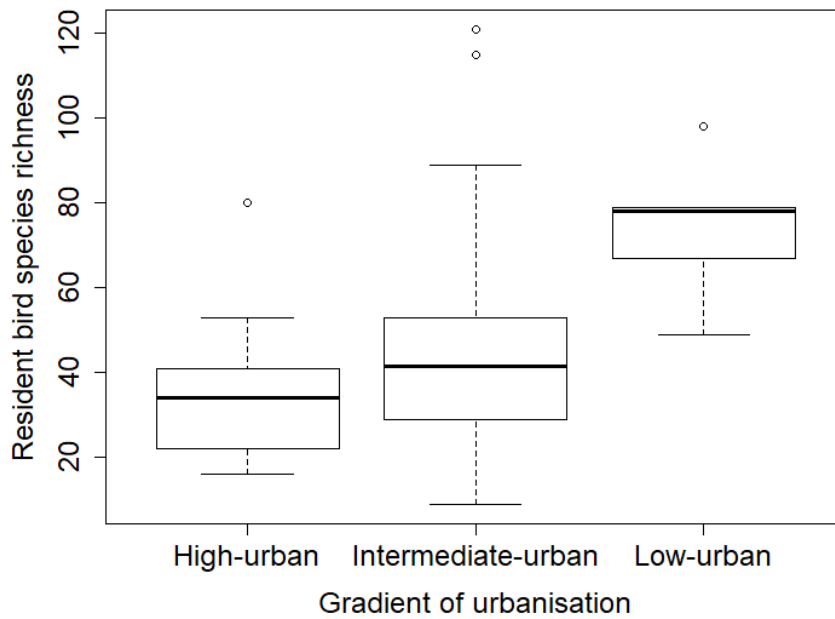

**ESM\_Fig\_2:** A box-and-whisker plot showing distribution of resident bird species richness across different gradient of urbanisation. Representation of gradient of urbanisation in the boxplot is as follows: Low-urban (Impervious surface <30%, human density<5,000/km<sup>2</sup>); Intermediate-urban (Impervious surface≥30 and ≤50%, human density>5,000/km<sup>2</sup>); High-urban (Impervious surface >50%, human density>5,000/km<sup>2</sup>). The plot shows a comparison of median value and inter-quartile range of the observed bird richness among high, intermediate and low built-up areas. The highest median value and lowest upper quartile at low urban area indicates that bird richness is consistently high at low urban sites which declined at high urban areas. The bird species richness at intermediate urban areas greatly vary which range from lowest to highest value.

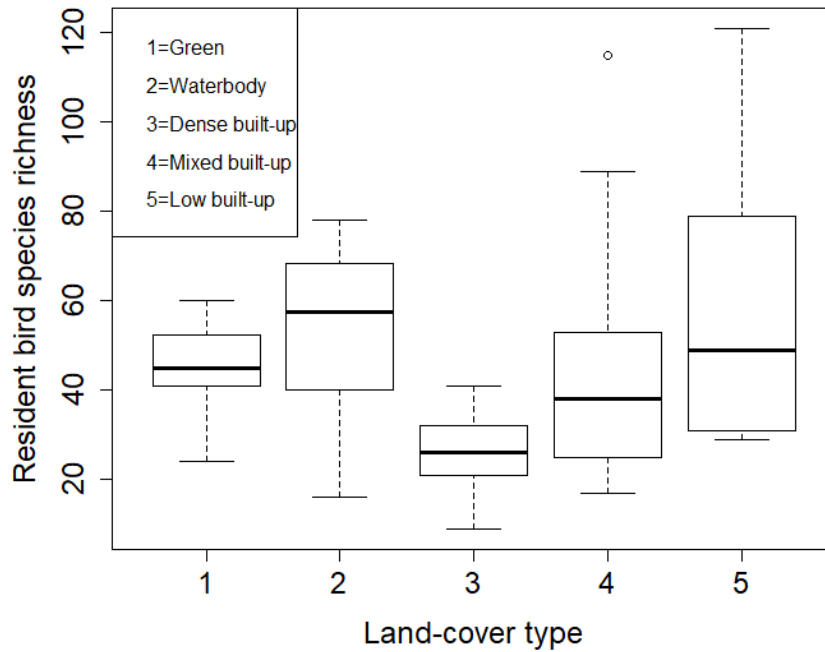

**ESM\_Fig\_3:** A box-and-whisker plot showing distribution of resident bird species richness (BSR) among different land-cover types. It displays a comparison of median value and inter-quartile range of the observed richness among five land-cover types. The median values indicated that the average bird richness is high in waterbody, green and low built-up areas and is the lowest in dense built-up areas. Areas consisting of low built-up and mixed built-up areas contained higher variation in bird species richness compared to other land-cover types.

## ESM (Electronic Supplementary Materials): Tables

**Authors:** Marufa Sultana, Luca Corlatti, Ilse Storch

**Journal name:** Urban Ecosystem

### ESM\_Table\_1: The sources of study locations and bird data

| <u>Ref.Id.</u> | <u>References</u>                                                                                                                                                                                | <u>City</u> | <u>Country</u> |
|----------------|--------------------------------------------------------------------------------------------------------------------------------------------------------------------------------------------------|-------------|----------------|
| 1              | Sarker NJ, Sultana D, Jaman MF, Rahman MK (2009) Diversity and population of avifauna of two urban sites in Dhaka, Bangladesh. <i>ECOPRINT</i> 16:1-8                                            | Dhaka       | Bangladesh     |
| 2              | Rajia S, Alam MM, Chowdhury GW, et al (2015) Status and diversity of birds of Ramna park, Dhaka, Bangladesh. <i>Bangladesh J Zool</i> 43(2):291-301, 2015                                        | Dhaka       | Bangladesh     |
| 3              | Ahsan MS, Nayeem B (2016) Inventory of Urban Avifauna: A Comparison of Bird Species of Two Urban Sites in Dhaka, Bangladesh. <i>Asian Journal of Applied Science and Engineering</i> . 5:173-182 | Dhaka       | Bangladesh     |
| 4              | Islam MS, Shahadat O, Kabir MM, et al (2014) Avifauna of National Botanical Garden of Bangladesh. <i>J.Taxon.Biodiv.Res.</i> 6:17-20                                                             | Dhaka       | Bangladesh     |
| 5              | Akash M, Hossain MA, Chowdhury GW, et al (2013) Status of Avifauna in Curzon hall premises university of Dhaka, Bangladesh. <i>ECOPRINT</i> 20:1-18                                              | Dhaka       | Bangladesh     |
| 6              | Banu FA, Akash M, Chowdhury GW, Hossain MA (2016) Status and seasonal occurrence of birds in Dhaka University campus. <i>Dhaka Univ. J. Biol. Sci.</i> 25(1):27-37                               | Dhaka       | Bangladesh     |
| 7              | Chowdhuri S, Aich U, Shahadat O (2014) Checklist of avian fauna of Dhaka University Campus, Bangladesh. <i>International Journal of Fauna and Biological Studies</i> 1(5): 54-60                 | Dhaka       | Bangladesh     |

| <u>Ref.Id.</u> | <u>References</u>                                                                                                                                                                                                                                             | <u>City</u> | <u>Country</u> |
|----------------|---------------------------------------------------------------------------------------------------------------------------------------------------------------------------------------------------------------------------------------------------------------|-------------|----------------|
| 8              | Akter S, Mandal BK, Khatun R, Alim MA (2017) Seasonal prevalence of giant mealy bug <i>Drosicha mangiferae</i> (Homoptera: Pseudococcidae) in the college of home economics, Dhaka, Bangladesh. <i>Journal of Entomology and Zoology Studies</i> 5(5):192-199 | Dhaka       | Bangladesh     |
| 9              | Shovon SC, Islam MS, Mahmud JA, Chowdhury MSN, et al (2014) Diversity of avifauna in Sher-E-Bangla Agricultural University campus. <i>International Journal of Business, social and scientific research</i> 2(1):58-63                                        | Dhaka       | Bangladesh     |
| 10             | Reza AMS, Hasan MA, Hossain M, Parween S (2012) Annotated checklist of birds of Rajshahi University campus: An update. <i>University Journal of Zoology Rajshahi University</i> 31:39-47                                                                      | Rajshahi    | Bangladesh     |
| 11             | Wadatkar JS (2001) Checklist of birds from Amravati University Campus, Maharashtra. <i>Zoos' Print Journal</i> 16(5):497-499                                                                                                                                  | Amravati    | India          |
| 12             | Rajashekara S, Venkatesha MG (2017a) Seasonal Incidence and Diversity Pattern of Avian Communities in the Bangalore University Campus India. <i>Proc Zool Soc</i> 70(2):178–193                                                                               | Bengalore   | India          |
| 13             | Rajashekara S, Venkatesha MG (2017b) Additions to the Birds of Bangalore University Campus (BUC), India. <i>Proc Zool Soc</i> (July-Dec 2017) 70(2):178–193                                                                                                   | Bengalore   | India          |
| 14             | Singh M, Kumar K, Roy TK, Ulman Y (2017) Avifaunal Composition of Jawaharlal Nehru University Campus, New Delhi. <i>Current World Environment</i> 12(2):317-325                                                                                               | Delhi       | India          |
| 15             | Chattopadhyay R, Ghoshal S (2015) Avifaunal diversity in two residential localities of Kolkata, India. <i>International letters of natural sciences</i> 48:61-66                                                                                              | Kolkata     | India          |
| 16             | Ghose PS, Santra SC (2008). Pattern of avian diversity in urban environment: a case study in Kolkata. <i>Zoological research in human welfare</i> 11: 127-148                                                                                                 | Kolkata     | India          |
| 17             | Shengupta S, Mondal M, Basu P (2014) Bird species assemblages across a rural urban gradient around Kolkata, India. <i>Urban Ecosystem</i> 17(2):585-596                                                                                                       | Kolkata     | India          |

| <u>Ref.Id.</u> | <u>References</u>                                                                                                                                                                                                   | <u>City</u> | <u>Country</u> |
|----------------|---------------------------------------------------------------------------------------------------------------------------------------------------------------------------------------------------------------------|-------------|----------------|
| 18             | Kedar GT, Patil GP (2012) Study of Avifauna diversity of Gandhi Sagar Lake, Nagpur, Maharashtra. Vidyabharati International Interdisciplinary Research Journal 1(2): 40-46                                          | Nagpur      | India          |
| 19             | Nerlekar AN, Warudkar AM, Gowande GG, et al (2016) A review of the faunal diversity of the Fergusson College campus, Pune, India. Zoos' Print 31(10):4-25                                                           | Pune        | India          |
| 20             | Dahal BR, Bhuj DR (2008) Bird Mobility and Their Habitat at Tribhuvan International Airport, Kathmandu. Nepal Journal of Science and Technology 9:119-130                                                           | Kathmandu   | Nepal          |
| 21             | Shaukat SS, Raza A (2016) Birds of Karachi University and Dow University of health sciences campuses, Karachi: With notes on their feeding habit. International Journal of Fauna and Biological Studies 3(5): 07-15 | Karachi     | Pakistan       |
| 22             | Abbas S, Hussain S, Gabol K, Tabassum R, et al (2013) Study of Avifauna in Safari park and University of Karachi, Pakistan. International Journal of Pure and Applied Zoology 1(3): 241-248                         | Karachi     | Pakistan       |
| 23             | Joshua G, Ali Z (2011) Avian diversity with the varying urban congestions of Lahore. Journal of Animal and Plant Sciences 21(421-428)                                                                               | Lahore      | Pakistan       |
| 24             | Sidra S, Ali Z, Chaudhury MN (2013) Avian Diversity at New Campus of Punjab University in Relation to Land Use Change. Pakistan Journal of Zoology 45(4): 1069-1082                                                 | Lahore      | Pakistan       |

**ESM\_Table\_2: The 57 urban locations used in the analysis, with duration of study, the number of total bird species, the number of resident bird species and the data source. The distribution of the locations with their unique ID are also presented in Fig.1.**

| <u>Location ID</u> | <u>Study area</u>                                       | <u>City</u> | <u>Country</u> | <u>Study duration</u>                                                                                | <u>Total bird species</u> | <u>Resident bird species</u> | <u>Source: Appendix. 2</u> |
|--------------------|---------------------------------------------------------|-------------|----------------|------------------------------------------------------------------------------------------------------|---------------------------|------------------------------|----------------------------|
| 1.                 | Sector 7 in Uttara                                      | Dhaka       | Bangladesh     | Aug 2004-Jul 2005                                                                                    | 25                        | 22                           | 1                          |
| 2.                 | Setor 9 in Uttara                                       | Dhaka       | Bangladesh     | Aug2004-Jul05                                                                                        | 18                        | 18                           | 1                          |
| 3.                 | Ramna park in Shahbagh                                  | Dhaka       | Bangladesh     | <sup>2</sup> Jul 2013-March 2014;<br><sup>3</sup> March 2012                                         | 54                        | 45                           | 2,3                        |
| 4.                 | National Botanical Garden in Mirpur                     | Dhaka       | Bangladesh     | Sep 2011-Feb 2012                                                                                    | 65                        | 56                           | 4                          |
| 5.                 | Campus of University of Dhaka                           | Dhaka       | Bangladesh     | <sup>5</sup> Jan 2012-Jan 2014;<br><sup>6</sup> Jul 2013-Feb 2014;<br><sup>7</sup> Jan 2012-Jun 2014 | 92                        | 80                           | 5,6,7                      |
| 6.                 | Home Economics College in Azimpur                       | Dhaka       | Bangladesh     | Jan 2015- Jan 2016                                                                                   | 23                        | 22                           | 8                          |
| 7.                 | Sher-e-Bangla Agricultural University Campus in Tejgaon | Dhaka       | Bangladesh     | May 2013-April 2014                                                                                  | 60                        | 53                           | 9                          |
| 8.                 | Curzon Hall of Dhaka University                         | Dhaka       | Bangladesh     | Jan2012-Jan2014                                                                                      | 50                        | 42                           | 5                          |

| <u>Location ID</u> | <u>Study area</u>                        | <u>City</u> | <u>Country</u> | <u>Study duration</u>                                               | <u>Total bird species</u> | <u>Resident bird species</u> | <u>Source: Appendix. 2</u> |
|--------------------|------------------------------------------|-------------|----------------|---------------------------------------------------------------------|---------------------------|------------------------------|----------------------------|
| 9.                 | Dhanmondi lake in Dhanmondi              | Dhaka       | Bangladesh     | March 2012                                                          | 17                        | 16                           | 3                          |
| 10.                | Rajshahi university campus               | Rajshahi    | Bangladesh     | March 2008-July 2012                                                | 159                       | 121                          | 10                         |
| 11.                | Amravati University Campus               | Amravati    | India          | 1996-Jan2000                                                        | 88                        | 67                           | 11                         |
| 12.                | Bangalore Unviersity campus              | Bangalore   | India          | <sup>12</sup> Feb 2008-Jan 2010;<br><sup>13</sup> Feb 2010-Jan 2014 | 134                       | 98                           | 12,13                      |
| 13.                | Jawaharlal Nehru University campus       | Delhi       | India          | Jan 2013-Dec 2016                                                   | 114                       | 79                           | 14                         |
| 14.                | Dhakuria                                 | Kolkata     | India          | Dec 2013-Nov 2014                                                   | 48                        | 41                           | 15                         |
| 15.                | Crossipore                               | Kolkata     | India          | Dec 2013-Nov 2014                                                   | 44                        | 39                           | 15                         |
| 16.                | ISI Baranagar                            | Kolkata     | India          | 2004-2006                                                           | 45                        | 39                           | 16                         |
| 17.                | Charaktala                               | Kolkata     | India          | Feb - Apr 2009                                                      | 21                        | 21                           | 17                         |
| 18.                | Kharadah                                 | Kolkata     | India          | Feb - Apr 2009                                                      | 32                        | 32                           | 17                         |
| 19.                | Urban parks and gardens-Rabindra Sarovar | Kolkata     | India          | 2004-2006                                                           | 58                        | 46                           | 16                         |
| 20.                | Urban parks and gardens-Victoria         | Kolkata     | India          | 2004-2006                                                           | 49                        | 43                           | 16                         |



| <u>Location ID</u> | <u>Study area</u>                       | <u>City</u> | <u>Country</u> | <u>Study duration</u>  | <u>Total bird species</u> | <u>Resident bird species</u> | <u>Source: Appendix. 2</u> |
|--------------------|-----------------------------------------|-------------|----------------|------------------------|---------------------------|------------------------------|----------------------------|
| 21.                | Open Areas- Maiden                      | Kolkata     | India          | 2004-2006              | 39                        | 35                           | 16                         |
| 22.                | Urban parks and gardens-Eden Gardens    | Kolkata     | India          | 2004-2006              | 51                        | 40                           | 16                         |
| 23.                | Urban parks and gardens-Rajbhawan       | Kolkata     | India          | 2004-2006              | 40                        | 41                           | 16                         |
| 24.                | Protected area- Narendrapur             | Kolkata     | India          | 2004-2006              | 81                        | 60                           | 16                         |
| 25.                | Barbaria                                | Kolkata     | India          | February to April 2009 | 36                        | 36                           | 17                         |
| 26.                | Gandhighat                              | Kolkata     | India          | February to April 2009 | 31                        | 31                           | 17                         |
| 27.                | Open Area-Kalyani Unviersity            | Kolkata     | India          | 2004-2006              | 73                        | 49                           | 16                         |
| 28.                | Protected area- Tollygunj Golf Club     | Kolkata     | India          | 2004-2006              | 48                        | 43                           | 16                         |
| 29.                | Urban parks and gardens-AHSI            | Kolkata     | India          | 2004-2006              | 58                        | 52                           | 16                         |
| 30.                | Urban parks and gardens-Subhash Sarovar | Kolkata     | India          | 2004-2006              | 46                        | 41                           | 16                         |
| 31.                | Protected area- Banabitan               | Kolkata     | India          | 2004-2006              | 75                        | 57                           | 16                         |

| <u>Location ID</u> | <u>Study area</u>                   | <u>City</u> | <u>Country</u> | <u>Study duration</u> | <u>Total bird species</u> | <u>Resident bird species</u> | <u>Source: Appendix. 2</u> |
|--------------------|-------------------------------------|-------------|----------------|-----------------------|---------------------------|------------------------------|----------------------------|
| 32.                | Protected area-<br>Botanical Garden | Kolkata     | India          | 2004-2006             | 63                        | 53                           | 16                         |
| 33.                | Esplanade                           | Kolkata     | India          | 2004-2006             | 39                        | 28                           | 16                         |
| 34.                | Tala Park                           | Kolkata     | India          | 2004-2006             | 40                        | 30                           | 16                         |
| 35.                | Panashree                           | Kolkata     | India          | Feb to Apr2009        | 25                        | 25                           | 17                         |
| 36.                | Shyamkhola                          | Kolkata     | India          | 2004-2006             | 96                        | 78                           | 16                         |
| 37.                | IIM, Joka                           | Kolkata     | India          | 2004-2006             | 87                        | 72                           | 16                         |
| 38.                | Wetland-Bheri<br>Areas,Nalban       | Kolkata     | India          | 2004-2006             | 121                       | 65                           | 16                         |
| 39.                | Wetland-Kalyani Jheel               | Kolkata     | India          | 2004-2006             | 58                        | 51                           | 16                         |
| 40.                | Wetland-Nature Park                 | Kolkata     | India          | 2004-2006             | 73                        | 64                           | 16                         |
| 41.                | Wetland-Santragachi                 | Kolkata     | India          | 2004-2006             | 64                        | 46                           | 16                         |
| 42.                | Gandhi Sagar Lake                   | Nagpur      | India          | Jan-Sep 2010          | 34                        | 34                           | 18                         |
| 43.                | Fergusson College<br>campus         | Pune        | India          | 2011-2014             | 137                       | 115                          | 19                         |
| 44.                | Tribhuvan<br>International Airport  | Kathmandu   | Nepal          | Jan-Dec 2001          | 35                        | 31                           | 20                         |

| <u>Location ID</u> | <u>Study area</u>                            | <u>City</u> | <u>Country</u> | <u>Study duration</u> | <u>Total bird species</u> | <u>Resident bird species</u> | <u>Source: Appendix. 2</u> |
|--------------------|----------------------------------------------|-------------|----------------|-----------------------|---------------------------|------------------------------|----------------------------|
| 45.                | Dow University of Health Sciences (D.U.H.S.) | Karachi     | Pakistan       | 2008-2015             | 40                        | 29                           | 21                         |
| 46.                | Safari park                                  | Karachi     | Pakistan       | Mar-Dec 2009          | 32                        | 24                           | 22                         |
| 47.                | Karachi University campus                    | Karachi     | Pakistan       | Mar-Dec 2009          | 38                        | 29                           | 22                         |
| 48.                | Samanabad Town (N Block)                     | Lahore      | Pakistan       | Mar-Dec 2009          | 15                        | 13                           | 23                         |
| 49.                | Data Ganj Baksh Town                         | Lahore      | Pakistan       | Mar-Dec 2009          | 22                        | 21                           | 23                         |
| 50.                | Shalimar Town (SinghPura)                    | Lahore      | Pakistan       | Mar-Dec 2009          | 10                        | 9                            | 23                         |
| 51.                | Ravi Town (Shairan Wala/Sheranwala gate)     | Lahore      | Pakistan       | Mar-Dec 2009          | 13                        | 12                           | 23                         |
| 52.                | Gulberg Town (Gulberg III)                   | Lahore      | Pakistan       | Mar-Dec 2009          | 29                        | 26                           | 23                         |
| 53.                | Asif Block of Allama Iqbal Town              | Lahore      | Pakistan       | Mar-Dec 2009          | 31                        | 28                           | 23                         |
| 54.                | Campus of Punjab Uni                         | Lahore      | Pakistan       | Jan-May2011           | 76                        | 49                           | 24                         |
| 55.                | Nishtar Town (Askari III Baidian Road)       | Lahore      | Pakistan       | Mar-Dec 2009          | 43                        | 38                           | 23                         |

| <u>Location ID</u> | <u>Study area</u>                   | <u>City</u> | <u>Country</u> | <u>Study duration</u> | <u>Total bird species</u> | <u>Resident bird species</u> | <u>Source: Appendix. 2</u> |
|--------------------|-------------------------------------|-------------|----------------|-----------------------|---------------------------|------------------------------|----------------------------|
| 56.                | Aziz Bhatti Town<br>(Infantry road) | Lahore      | Pakistan       | Mar-Dec 2009          | 19                        | 17                           | 23                         |
| 57.                | Wagah Town<br>(Batapur)             | Lahore      | Pakistan       | Mar-Dec 2009          | 47                        | 42                           | 23                         |

**ESM\_Table\_3: A list of local environmental factors used in the preliminary investigation. The predictor variables which are used in the model analysis are shown in bold and are also presented in Table 1.**

| <u>Variables</u>                        | <u>Description</u>                                                                                                                                                                      | <u>Data type</u> | <u>Data source</u>            |
|-----------------------------------------|-----------------------------------------------------------------------------------------------------------------------------------------------------------------------------------------|------------------|-------------------------------|
| <b>Proportion of impervious surface</b> | Value 0-100, Percentage of ‘Impervious surface’ from ‘Global Man-made Impervious Surface (GMIS) and Global Human Built-up and Settlement Extent (HBASE) data products’, resolution ~30m | Continuous       | Brown et al 2017              |
| <b>Human population density</b>         | Average density of populations of the years 2005, 2010, 2015, from Gridded Population of the World Version 4 (GPWv4), resolution ~1Km                                                   | Continuous       | CIESIN 2016                   |
| Gradient of urbanisation*               | High-urban, Intermediate-urban, Low-urban                                                                                                                                               | Categorical      | Brown et al 2017; CIESIN 2016 |
| <b>Habitat Shannon metrics</b>          | Value of ‘Diversity of EVI (Enhanced Vegetation Index)’, from Global Habitat Heterogeneity dataset, resolution ~ 30 arc-second                                                          | Continuous       | Tuanmu and Jetz 2015          |
| Habitat dissimilarity                   | Value of habitat dissimilarity index, from Global Habitat Heterogeneity dataset, resolution ~ 30 arc-second                                                                             | Continuous       | Tuanmu and Jetz 2015          |
| Habitat homogeneity                     | Value of habitat homogeneity index from Global Habitat Heterogeneity dataset, resolution ~ 30 arc-second                                                                                | Continuous       | Tuanmu and Jetz 2015          |
| Built-up area                           | Value 13 from MODIS based Global Land Cover Climatology dataset, based on 10 years (2001-2010), resolution ~500m                                                                        | Categorical      | Broxton 2014                  |
| Wetland area                            | Value 0 and 11 from MODIS based Global Land Cover Climatology dataset,                                                                                                                  | Categorical      | Broxton 2014                  |

| <u>Variables</u>              | <u>Description</u>                                                                                                         | <u>Data type</u> | <u>Data source</u>             |
|-------------------------------|----------------------------------------------------------------------------------------------------------------------------|------------------|--------------------------------|
|                               | based on 10 years (2001-2010),<br>resolution ~500m                                                                         |                  |                                |
| Barren area                   | Value 16 from MODIS based Global Land Cover Climatology dataset are based on 10 years (2001-2010), resolution ~500m        | Categorical      | Broxton 2014                   |
| <b>Presence of cropland</b>   | Value 20, Mosaic cropland (50-70%) / vegetation (grassland/shrubland/forest) (20-50%), GLOBCOVER dataset, resolution ~300m | Categorical      | ESA 2009,<br>Arino et al. 2008 |
| Forest area                   | Value 110, Mosaic forest or shrubland (50-70%) / grassland (20-50%), 'GLOBCOVER' dataset, resolution ~300m                 | Continuous       | ESA 2009,<br>Arino et al. 2008 |
| <b>Tree canopy cover</b>      | Value 0-100, Percentage of tree canopy cover, Global Landsat TreeCover 2010 dataset, resolution ~30 m                      | Continuous       | Sexton 2013                    |
| Annual Temperature            | Bio-1: Average annual temperature, WorldClim dataset, resolution ~1Km                                                      | Continuous       | Fick et al 2017                |
| Seasonal temperature          | Bio-4: Average temperature seasonality, WorldClim dataset, resolution ~1Km                                                 | Continuous       | Fick et al 2017                |
| Annual Precipitation          | Bio-12: Average annual precipitation, WorldClim dataset, resolution ~1Km                                                   | Continuous       | Fick et al 2017                |
| Seasonal precipitation        | Bio-15: Average precipitation seasonality, resolution ~1Km                                                                 | Continuous       | Fick et al 2017                |
| Elevation                     | SRTM elevation 2000 dataset, resolution ~ 3 arc-second                                                                     | Continuous       | de Ferranti 2017               |
| Land cover types <sup>†</sup> | As green, waterbody, built-up <sup>‡</sup> (high built-up, mixed built-up, low built-up)                                   | Categorical      | Source paper,<br>Google Earth  |

Note: \*Gradient of urbanisation: we explored three categories of degree of urbanisation as follows: 'Low-urban' (Impervious surface <30%, human density <5000/km<sup>2</sup>), 'Intermediate-urban' (Impervious surface =>30 and =<50%, human density >5000/km<sup>2</sup>) and 'High-urban' (Impervious surface >50%, human density

>5000/km<sup>2</sup>). Here, we followed the threshold of impervious surface for urbanisation categories, used by Marzluff (2001). However, for human population density, we considered 5000/km<sup>2</sup> (instead of 1000/km<sup>2</sup> as proposed by Marzluff et al. 2001) as a threshold. None of our locations was in a pure rural site, and the majority contained population densities >1000/km<sup>2</sup>. This categorisation allowed us to visualise dissimilarity in bird species richness among the urban locations at 1000m scale extent but not at 5000m scale extent.

†Land cover types: We recorded five land cover types among the study locations. We noted each study site to one of three land-cover type in reference to the original publication, 'Green' (if the study sites were declared as parks, protected areas, garden or a green area), 'Waterbody' (if the study sites were declared as lakes, rivers or a wetland site) and 'Built-up'(if study sites were declared as local administrative units, campus areas, or any urban sites). 'Built-up' areas were further sub-divided into 'Dense built-up', 'Mixed built-up' and 'Low built-up'. These built-up categories were documented, using satellite images of nearest corresponding year from Google Earth, with an approximate eye alt view of 1 km. See the template images below for more clarity.

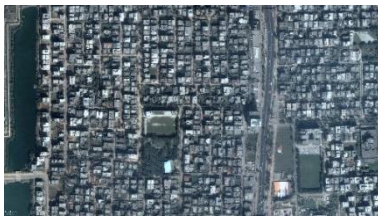

**Dense built-up area**

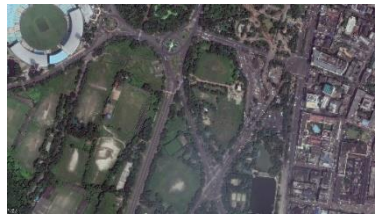

**Mixed built-up**

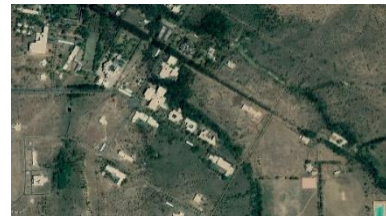

**Low built-up**

## References

- Arino O, Bicheron P, Achard F, Latham J, Witt R, Weber JL (2008) The most detailed portrait of Earth. European Space Agency, 136, 25-31
- Brown de Colstoun EC, Huang C, Wang P, Tilton JC, Tan B, Phillips J, Niemczura S, Ling P-Y, Wolfe RE (2017) Global Man-made Impervious Surface (GMIS) Dataset from Landsat. Palisades, NY: NASA Socioeconomic Data and Applications Center (SEDAC). Accessed 10 May 2008, doi: <https://doi.org/10.7927/H4P55KKF>
- Broxton PD, Zeng X, Sulla-Menashe D, Troch PA (2014) A Global Land Cover Climatology Using MODIS Data. *J. Appl. Meteor. Climatol.* 53, 1593-1605. doi: <http://dx.doi.org/10.1175/JAMC-D-13-0270.1>
- CIESIN (Center for International Earth Science Information Network - Columbia University) (2016) Documentation for the Gridded Population of the World, Version 4 (GPWv4). Palisades NY: NASA Socioeconomic Data and Applications Center (SEDAC). <http://dx.doi.org/10.7927/H4D50JX4>
- de Ferranti J 2017. 'Digital Elevation Data'. Viewfinder Panoramas ([www.viewfinderPanoramas.org/dem3.html](http://www.viewfinderPanoramas.org/dem3.html)); based on NASA's Shuttle Radar Topography Mission (SRTM) data (<http://www2.jpl.nasa.gov/srtm/>). DOI : 10.5258/SOTON/WP00644
- ESA (2009) Global Land Cover Map (GlobCover 2009 Project). European Space Agency (ESA), available at, [http://due.esrin.esa.int/page\\_globcover.php](http://due.esrin.esa.int/page_globcover.php)
- Fick SE, Hijmans RJ (2017) WorldClim 2: new 1-km spatial resolution climate surfaces for global land areas. *International journal of climatology*, 37(12), 4302-4315
- Sexton JO, Xiao-Peng S, Min F, Praveen N, et al (2013) Global, 30-m resolution continuous fields of tree cover: Landsat-based rescaling of MODIS vegetation continuous fields with lidar-based estimates of error, *International Journal of Digital Earth*, 6:5, 427-448, doi: 10.1080/17538947.2013.786146
- Tuanmu MN, Jetz W (2015) A global, remote sensing-based characterization of terrestrial habitat heterogeneity for biodiversity and ecosystem modelling. *Global Ecology and Biogeography*. doi: 10.1111/geb.12365
